# Supplementary material for: High-throughput metabolomics for the design and validation of a diauxic shift model
Source: PubMed Central journal article supplement (PMC10082077; doi:10.1038/s41540-023-00274-9), 2023-04-07
Supplement: 41540_2023_274_MOESM1_ESM.pdf [file 41540_2023_274_MOESM1_ESM.pdf]

## Supplementary information

### High-throughput metabolomics for the design and validation of a diauxic shift model

Daniel Brunnsåker<sup>1,\*</sup>, Gabriel K. Reder<sup>1</sup>, Nikul K. Soni<sup>1</sup>, Otto I. Savolainen<sup>1,2</sup>, Alexander H. Gower<sup>1</sup>, Ievgeniia A. Tiukova<sup>1,3</sup> & Ross D. King<sup>1,4,5</sup>

<sup>1</sup> Department of Biology and Biological Engineering, Chalmers University of Technology, Göteborg, Sweden

<sup>2</sup> Department of Clinical Nutrition, University of Eastern Finland, Kuopio, Finland

<sup>3</sup> Division of Industrial Biotechnology, KTH Royal Institute of Technology, Stockholm, Sweden

<sup>4</sup> Department of Chemical Engineering and Biotechnology, University of Cambridge, Cambridge, UK

<sup>5</sup> Alan Turing Institute, London, UK

\* danbru@chalmers.se

## Supplementary Tables

Supplementary Table 1. Statistical parameters for cross-phase (pre shift vs. post shift) analysis using detected metabolites intersecting with the KEGG database on *S. cerevisiae*.

| KEGG ID | logFC    | AveExpr    | t       | P-Value    | Functional annotation in KEGG |
|---------|----------|------------|---------|------------|-------------------------------|
| C00253  | 2.1151   | -0.56388   | 8.3132  | 8.4421e-13 | True                          |
| C02560  | 1.3226   | -0.32281   | 8.1267  | 2.0625e-12 | False                         |
| C08370  | -1.9041  | 0.097606   | -8.1218 | 2.1112e-12 | False                         |
| C01879  | 2.1481   | -0.86703   | 7.9815  | 4.1264e-12 | True                          |
| C03134  | 1.7288   | -0.53257   | 7.8143  | 9.1477e-12 | True                          |
| C01717  | 1.4448   | -0.40508   | 7.4666  | 4.7457e-11 | True                          |
| C07480  | -3.01    | -0.51481   | -7.2015 | 1.6469e-10 | True                          |
| C02320  | 2.8651   | -2.0097    | 6.8831  | 7.2351e-10 | True                          |
| C00954  | 0.87431  | -0.059959  | 6.7863  | 1.131e-09  | True                          |
| C00147  | 2.4584   | -1.5376    | 6.5785  | 2.9288e-09 | True                          |
| C14291  | -2.015   | -0.74106   | -6.3753 | 7.3626e-09 | False                         |
| C01046  | 1.5891   | -0.46324   | 6.3288  | 9.0805e-09 | True                          |
| C00588  | 2.5234   | -1.0696    | 6.228   | 1.4272e-08 | True                          |
| C00025  | 1.5123   | -0.61454   | 6.111   | 2.4051e-08 | True                          |
| C06343  | 0.96117  | -0.25855   | 6.0233  | 3.5483e-08 | False                         |
| C00170  | 2.5001   | -1.7441    | 5.6365  | 1.9181e-07 | True                          |
| C06343  | -1.1492  | -0.0090551 | -5.5502 | 2.7766e-07 | True                          |
| C00148  | 1.6125   | -1.264     | 4.769   | 6.986e-06  | True                          |
| C02727  | 1.4557   | -1.1299    | 4.6472  | 1.1295e-05 | True                          |
| C00315  | 1.7898   | 1.4669     | 4.559   | 1.5922e-05 | True                          |
| C10494  | -0.53427 | -0.5226    | -3.8978 | 0.00018507 | False                         |
| C11874  | -0.71187 | 0.26365    | -3.8425 | 0.00022486 | True                          |
| C00670  | 1.2307   | -0.47112   | 3.7041  | 0.00036327 | True                          |

|        |           |            |          |            |       |
|--------|-----------|------------|----------|------------|-------|
| C00114 | 0.62645   | -0.2936    | 3.6524   | 0.00043329 | True  |
| C01012 | -0.44699  | 0.0020465  | -3.4603  | 0.00082257 | False |
| C13355 | -0.84673  | -0.54404   | -3.4399  | 0.00087944 | False |
| C07475 | -0.32851  | -0.26963   | -3.421   | 0.00093517 | True  |
| C08183 | -0.6734   | -0.043878  | -3.4014  | 0.00099673 | False |
| C06414 | 0.42093   | -0.0012884 | 2.5939   | 0.011055   | False |
| C10120 | -0.61261  | 0.14136    | -2.5574  | 0.012197   | False |
| C00371 | 0.19175   | 0.06823    | 2.5543   | 0.012298   | True  |
| C08437 | -1.0232   | -0.62035   | -2.3713  | 0.019827   | False |
| C10561 | -0.67274  | -0.36864   | -2.3545  | 0.020692   | False |
| C00163 | -1.5194   | -1.1467    | -2.1721  | 0.032445   | True  |
| C00242 | 0.37424   | -0.42955   | 2.1255   | 0.036251   | True  |
| C08626 | -1.5395   | -0.87497   | -2.1013  | 0.038373   | False |
| C18877 | -0.58746  | 0.00043944 | -2.0121  | 0.047157   | False |
| C06425 | -0.71554  | -0.013201  | -1.7887  | 0.076986   | True  |
| C03758 | -0.18739  | 0.042517   | -1.7045  | 0.091695   | True  |
| C11087 | 0.16784   | 0.18302    | 1.6748   | 0.097397   | False |
| C06545 | -0.56631  | 0.19685    | -1.6388  | 0.1047     | ns    |
| C15545 | 0.14034   | 0.02898    | 1.6344   | 0.10563    | ns    |
| D00663 | -0.19869  | -0.056587  | -1.6152  | 0.10973    | ns    |
| C07592 | -0.42917  | -0.91903   | -1.6088  | 0.11112    | ns    |
| C14790 | -0.11719  | -0.011289  | -1.6083  | 0.11122    | ns    |
| C14412 | -0.1471   | 0.060613   | -1.5067  | 0.13535    | ns    |
| C17762 | 0.45108   | -5.4462    | 1.4803   | 0.14223    | ns    |
| C04294 | -0.14434  | -0.016097  | -1.238   | 0.2189     | ns    |
| C00144 | 0.19579   | 0.22038    | 1.2277   | 0.22272    | ns    |
| C10702 | -0.50448  | -0.50521   | -1.163   | 0.24787    | ns    |
| C08610 | -0.32119  | 0.059887   | -1.1428  | 0.25611    | ns    |
| C14428 | -0.13227  | -0.58898   | -1.1401  | 0.25723    | ns    |
| C00106 | 0.10232   | 0.091596   | 1.1276   | 0.26246    | ns    |
| D02500 | -0.15571  | -0.24523   | -1.1133  | 0.26851    | ns    |
| C08261 | -0.093519 | -0.053772  | -1.104   | 0.27248    | ns    |
| C10645 | 0.30331   | -0.20745   | 1.093    | 0.27725    | ns    |
| C10430 | 0.097051  | -0.48387   | 1.0384   | 0.30181    | ns    |
| C01588 | -0.16453  | 0.0041303  | -1.0202  | 0.31032    | ns    |
| C00852 | -0.248    | -0.43656   | -0.93486 | 0.35233    | ns    |
| C00495 | -0.47346  | -0.58054   | -0.91741 | 0.36135    | ns    |
| C12679 | 0.15596   | -0.064885  | 0.908    | 0.36627    | ns    |
| C03354 | -0.070604 | -0.059314  | -0.90574 | 0.36746    | ns    |
| C00141 | 0.18939   | -0.10491   | 0.83595  | 0.40537    | ns    |
| C00314 | -0.085649 | 0.12888    | -0.79866 | 0.42656    | ns    |
| C10331 | -0.20072  | -0.051982  | -0.77964 | 0.43762    | ns    |
| C12227 | 0.19812   | -5.2438    | 0.76333  | 0.44724    | ns    |
| C00074 | 0.095684  | -0.096283  | 0.76061  | 0.44885    | ns    |
| C11519 | -0.24608  | 0.032882   | -0.70728 | 0.4812     | ns    |
| C06105 | -0.081756 | -0.14115   | -0.64162 | 0.52273    | ns    |
| C00597 | -0.11523  | -0.21063   | -0.62537 | 0.53329    | ns    |
| C06526 | 0.094473  | -0.41016   | 0.56774  | 0.5716     | ns    |
| C12144 | -0.089333 | -0.061213  | -0.53892 | 0.59125    | ns    |
| C14229 | -0.047544 | -0.14739   | -0.50677 | 0.61354    | ns    |
| C01118 | -0.11158  | -0.31506   | -0.4493  | 0.65428    | ns    |
| C02348 | 0.063959  | 0.17142    | 0.40938  | 0.68322    | ns    |
| C00417 | 0.035916  | -0.054701  | 0.395    | 0.69376    | ns    |
| C01234 | -0.028129 | 0.061637   | -0.39112 | 0.69662    | ns    |

|        |            |           |           |         |    |
|--------|------------|-----------|-----------|---------|----|
| D02500 | 0.082678   | -0.10947  | 0.35644   | 0.72234 | ns |
| C01996 | 0.054353   | -0.10297  | 0.34246   | 0.7328  | ns |
| C00768 | -0.04082   | 0.05488   | -0.27158  | 0.78656 | ns |
| C00955 | 0.083977   | -0.13342  | 0.22135   | 0.82531 | ns |
| C06343 | -0.022197  | 0.13313   | -0.20797  | 0.83572 | ns |
| C00212 | 0.053423   | -0.86336  | 0.19671   | 0.84449 | ns |
| C20157 | -0.015491  | 0.05251   | -0.18293  | 0.85526 | ns |
| C01479 | 0.045039   | 0.47231   | 0.17479   | 0.86163 | ns |
| C05141 | 0.11556    | -0.80673  | 0.17441   | 0.86193 | ns |
| C20197 | -0.018317  | -0.22608  | -0.15437  | 0.87766 | ns |
| C10472 | -0.026126  | -0.08686  | -0.14214  | 0.88729 | ns |
| C00836 | -0.015821  | -0.051852 | -0.086497 | 0.93126 | ns |
| C00123 | -0.0055516 | 0.11414   | -0.077611 | 0.93831 | ns |
| C19261 | -0.001685  | -0.018462 | -0.024834 | 0.98024 | ns |

Supplementary Table 2. Exclusion table for reference ions

| On   | Prec. m/z | Delta m/z (ppm) | Z | Prec. Type | Ret. Time (min) | Delta Ret. Time(min) | Iso. Width      | Collision Energy |
|------|-----------|-----------------|---|------------|-----------------|----------------------|-----------------|------------------|
| TRUE | 74.06001  | 20              | 1 | Exclude    | 0.627           | 13                   | Medium (~4 m/z) |                  |
| TRUE | 85.0283   | 20              | 1 | Exclude    | 0.969           | 13                   | Medium (~4 m/z) |                  |
| TRUE | 93.05     | 20              | 1 | Exclude    | 0.8             | 13                   | Medium (~4 m/z) |                  |
| TRUE | 97.02808  | 20              | 1 | Exclude    | 0.696           | 13                   | Medium (~4 m/z) |                  |
| TRUE | 104.107   | 20              | 1 | Exclude    | 0.666           | 13                   | Medium (~4 m/z) |                  |
| TRUE | 111.05611 | 20              | 1 | Exclude    | 0.714           | 13                   | Medium (~4 m/z) |                  |
| TRUE | 113.03535 | 20              | 1 | Exclude    | 0.948           | 13                   | Medium (~4 m/z) |                  |
| TRUE | 115.05564 | 20              | 1 | Exclude    | 0.736           | 13                   | Medium (~4 m/z) |                  |
| TRUE | 116.07066 | 20              | 1 | Exclude    | 0.733           | 13                   | Medium (~4 m/z) |                  |
| TRUE | 117.02361 | 20              | 1 | Exclude    | 1.043           | 13                   | Medium (~4 m/z) |                  |
| TRUE | 119.03972 | 20              | 1 | Exclude    | 2.686           | 13                   | Medium (~4 m/z) |                  |
| TRUE | 120.06516 | 20              | 1 | Exclude    | 0.669           | 13                   | Medium (~4 m/z) |                  |
| TRUE | 124.03938 | 20              | 1 | Exclude    | 0.765           | 13                   | Medium (~4 m/z) |                  |
| TRUE | 126.99873 | 20              | 1 | Exclude    | 0.513           | 13                   | Medium (~4 m/z) |                  |
| TRUE | 130.05074 | 20              | 1 | Exclude    | 0.67            | 13                   | Medium (~4 m/z) |                  |
| TRUE | 130.06525 | 20              | 1 | Exclude    | 1.628           | 13                   | Medium (~4 m/z) |                  |
| TRUE | 132.10498 | 20              | 1 | Exclude    | 1.469           | 13                   | Medium (~4 m/z) |                  |
| TRUE | 135.02769 | 20              | 1 | Exclude    | 1.009           | 13                   | Medium (~4 m/z) |                  |
| TRUE | 136.06694 | 20              | 1 | Exclude    | 2.685           | 13                   | Medium (~4 m/z) |                  |
| TRUE | 137.0708  | 20              | 1 | Exclude    | 2.6             | 13                   | Medium (~4 m/z) |                  |
| TRUE | 146.06009 | 20              | 1 | Exclude    | 3.888           | 13                   | Medium (~4 m/z) |                  |
| TRUE | 146.16512 | 20              | 1 | Exclude    | 0.567           | 13                   | Medium (~4 m/z) |                  |
| TRUE | 147.07664 | 20              | 1 | Exclude    | 0.777           | 13                   | Medium (~4 m/z) |                  |
| TRUE | 147.07874 | 20              | 1 | Exclude    | 0.667           | 13                   | Medium (~4 m/z) |                  |
| TRUE | 147.11334 | 20              | 1 | Exclude    | 1.71            | 13                   | Medium (~4 m/z) |                  |
| TRUE | 148.06178 | 20              | 1 | Exclude    | 1.617           | 13                   | Medium (~4 m/z) |                  |
| TRUE | 148.09698 | 20              | 1 | Exclude    | 0.97            | 13                   | Medium (~4 m/z) |                  |
| TRUE | 150.05872 | 20              | 1 | Exclude    | 1.599           | 13                   | Medium (~4 m/z) |                  |
| TRUE | 152.05833 | 20              | 1 | Exclude    | 1.611           | 13                   | Medium (~4 m/z) |                  |
| TRUE | 156.07776 | 20              | 1 | Exclude    | 0.605           | 13                   | Medium (~4 m/z) |                  |
| TRUE | 161.07297 | 20              | 1 | Exclude    | 0.73            | 13                   | Medium (~4 m/z) |                  |
| TRUE | 162.07744 | 20              | 1 | Exclude    | 0.863           | 13                   | Medium (~4 m/z) |                  |
| TRUE | 162.09616 | 20              | 1 | Exclude    | 4.038           | 13                   | Medium (~4 m/z) |                  |
| TRUE | 162.11411 | 20              | 1 | Exclude    | 0.646           | 13                   | Medium (~4 m/z) |                  |

|      |           |    |   |         |       |    |                 |  |
|------|-----------|----|---|---------|-------|----|-----------------|--|
| TRUE | 165.0547  | 20 | 1 | Exclude | 1.31  | 13 | Medium (~4 m/z) |  |
| TRUE | 166.08864 | 20 | 1 | Exclude | 1.995 | 13 | Medium (~4 m/z) |  |
| TRUE | 168.99248 | 20 | 1 | Exclude | 0.951 | 13 | Medium (~4 m/z) |  |
| TRUE | 170.08148 | 20 | 1 | Exclude | 1.049 | 13 | Medium (~4 m/z) |  |
| TRUE | 175.1194  | 20 | 1 | Exclude | 0.618 | 13 | Medium (~4 m/z) |  |
| TRUE | 176.07057 | 20 | 1 | Exclude | 3.607 | 13 | Medium (~4 m/z) |  |
| TRUE | 176.07486 | 20 | 1 | Exclude | 2.497 | 13 | Medium (~4 m/z) |  |
| TRUE | 184.07326 | 20 | 1 | Exclude | 1.191 | 13 | Medium (~4 m/z) |  |
| TRUE | 187.00047 | 20 | 1 | Exclude | 1.722 | 13 | Medium (~4 m/z) |  |
| TRUE | 189.12334 | 20 | 1 | Exclude | 0.885 | 13 | Medium (~4 m/z) |  |
| TRUE | 190.05324 | 20 | 1 | Exclude | 2.97  | 13 | Medium (~4 m/z) |  |
| TRUE | 192.04839 | 20 | 1 | Exclude | 3.113 | 13 | Medium (~4 m/z) |  |
| TRUE | 199.01791 | 20 | 1 | Exclude | 0.742 | 13 | Medium (~4 m/z) |  |
| TRUE | 199.02307 | 20 | 1 | Exclude | 1.156 | 13 | Medium (~4 m/z) |  |
| TRUE | 205.0997  | 20 | 1 | Exclude | 2.447 | 13 | Medium (~4 m/z) |  |
| TRUE | 209.09251 | 20 | 1 | Exclude | 1.804 | 13 | Medium (~4 m/z) |  |
| TRUE | 209.09503 | 20 | 1 | Exclude | 1.805 | 13 | Medium (~4 m/z) |  |
| TRUE | 215.01663 | 20 | 1 | Exclude | 0.674 | 13 | Medium (~4 m/z) |  |
| TRUE | 219.02655 | 20 | 1 | Exclude | 0.663 | 13 | Medium (~4 m/z) |  |
| TRUE | 220.07642 | 20 | 1 | Exclude | 1.459 | 13 | Medium (~4 m/z) |  |
| TRUE | 220.08636 | 20 | 1 | Exclude | 1.632 | 13 | Medium (~4 m/z) |  |
| TRUE | 244.09482 | 20 | 1 | Exclude | 0.681 | 13 | Medium (~4 m/z) |  |
| TRUE | 245.07892 | 20 | 1 | Exclude | 5.342 | 13 | Medium (~4 m/z) |  |
| TRUE | 256.082   | 20 | 1 | Exclude | 0.766 | 13 | Medium (~4 m/z) |  |
| TRUE | 258.1102  | 20 | 1 | Exclude | 0.962 | 13 | Medium (~4 m/z) |  |
| TRUE | 258.11264 | 20 | 1 | Exclude | 0.68  | 13 | Medium (~4 m/z) |  |
| TRUE | 259.13254 | 20 | 1 | Exclude | 5.974 | 13 | Medium (~4 m/z) |  |
| TRUE | 261.03717 | 20 | 1 | Exclude | 0.677 | 13 | Medium (~4 m/z) |  |
| TRUE | 263.00851 | 20 | 1 | Exclude | 0.986 | 13 | Medium (~4 m/z) |  |
| TRUE | 265.11243 | 20 | 1 | Exclude | 0.619 | 13 | Medium (~4 m/z) |  |
| TRUE | 268.10373 | 20 | 1 | Exclude | 1.61  | 13 | Medium (~4 m/z) |  |
| TRUE | 268.10782 | 20 | 1 | Exclude | 1.031 | 13 | Medium (~4 m/z) |  |
| TRUE | 276.14435 | 20 | 1 | Exclude | 1.231 | 13 | Medium (~4 m/z) |  |
| TRUE | 277.13943 | 20 | 1 | Exclude | 0.675 | 13 | Medium (~4 m/z) |  |
| TRUE | 277.14313 | 20 | 1 | Exclude | 0.701 | 13 | Medium (~4 m/z) |  |
| TRUE | 294.15512 | 20 | 1 | Exclude | 1.233 | 13 | Medium (~4 m/z) |  |
| TRUE | 298.09848 | 20 | 1 | Exclude | 0.651 | 13 | Medium (~4 m/z) |  |
| TRUE | 298.11035 | 20 | 1 | Exclude | 2.685 | 13 | Medium (~4 m/z) |  |
| TRUE | 302.30386 | 20 | 1 | Exclude | 6.117 | 13 | Medium (~4 m/z) |  |
| TRUE | 302.31317 | 20 | 1 | Exclude | 6.078 | 13 | Medium (~4 m/z) |  |
| TRUE | 305.09637 | 20 | 1 | Exclude | 3.114 | 13 | Medium (~4 m/z) |  |
| TRUE | 308.09338 | 20 | 1 | Exclude | 1.585 | 13 | Medium (~4 m/z) |  |
| TRUE | 308.10034 | 20 | 1 | Exclude | 0.975 | 13 | Medium (~4 m/z) |  |
| TRUE | 312.11166 | 20 | 1 | Exclude | 1.21  | 13 | Medium (~4 m/z) |  |
| TRUE | 318.29724 | 20 | 1 | Exclude | 5.97  | 13 | Medium (~4 m/z) |  |
| TRUE | 318.30042 | 20 | 1 | Exclude | 6.015 | 13 | Medium (~4 m/z) |  |
| TRUE | 325.10614 | 20 | 1 | Exclude | 5.39  | 13 | Medium (~4 m/z) |  |
| TRUE | 325.11301 | 20 | 1 | Exclude | 0.708 | 13 | Medium (~4 m/z) |  |
| TRUE | 327.09659 | 20 | 1 | Exclude | 5.793 | 13 | Medium (~4 m/z) |  |
| TRUE | 328.32593 | 20 | 1 | Exclude | 6.323 | 13 | Medium (~4 m/z) |  |
| TRUE | 335.2905  | 20 | 1 | Exclude | 7.214 | 13 | Medium (~4 m/z) |  |
| TRUE | 343.1235  | 20 | 1 | Exclude | 0.575 | 13 | Medium (~4 m/z) |  |
| TRUE | 346.3313  | 20 | 1 | Exclude | 6.235 | 13 | Medium (~4 m/z) |  |
| TRUE | 353.16058 | 20 | 1 | Exclude | 5.432 | 13 | Medium (~4 m/z) |  |

|      |           |    |   |         |       |    |                 |  |
|------|-----------|----|---|---------|-------|----|-----------------|--|
| TRUE | 376.31891 | 20 | 1 | Exclude | 6.822 | 13 | Medium (~4 m/z) |  |
| TRUE | 381.35123 | 20 | 1 | Exclude | 8.954 | 13 | Medium (~4 m/z) |  |
| TRUE | 422.17526 | 20 | 1 | Exclude | 5.074 | 13 | Medium (~4 m/z) |  |
| TRUE | 423.0896  | 20 | 1 | Exclude | 0.575 | 13 | Medium (~4 m/z) |  |
| TRUE | 435.33362 | 20 | 1 | Exclude | 5.692 | 13 | Medium (~4 m/z) |  |
| TRUE | 437.19403 | 20 | 1 | Exclude | 5.917 | 13 | Medium (~4 m/z) |  |
| TRUE | 446.15793 | 20 | 1 | Exclude | 0.684 | 13 | Medium (~4 m/z) |  |
| TRUE | 507.41199 | 20 | 1 | Exclude | 8.224 | 13 | Medium (~4 m/z) |  |
| TRUE | 810.59    | 20 | 1 | Exclude | 6.787 | 13 | Medium (~4 m/z) |  |
